# Supplementary material for: Practice Exploration on the Integrated Clinical-Rehabilitation Treatment Scheme Based on the Quality Function Deployment Model
Source: Research Square preprint supplement (doi:10.21203/rs.3.rs-7987126/v1), 2026-01-12
Supplement: Supplementary file 1 [file 031bd4a25c159f0953c26f84.docx]

Kano Questionnaire for the Construction of Integrated Clinical Rehabilitation

To better observe integrated clinical rehabilitation and strengthen the management of rehabilitation treatment, we invite you to participate in this survey. For each requirement, please provide feedback from two aspects: whether you think it would be better to have this function, and whether the absence of this requirement would cause an impact. Thank you for your cooperation. Please tick (√) the appropriate box.

1.Automatic identification of errors in rehabilitation treatment program arrangements*

|  | Very satisfied | Taken for granted | Indifferent | Reluctantly accept | Very dissatisfied |
| --- | --- | --- | --- | --- | --- |
| Your evaluation if this function is available |  |  |  |  |  |
| Your evaluation if this function is not available |  |  |  |  |  |

1. Automatic summarization of rehabilitation programs for appropriate arrangement and generation of notification forms*

|  | Very satisfied | Taken for granted | Indifferent | Reluctantly accept | Very dissatisfied |
| --- | --- | --- | --- | --- | --- |
| Your evaluation if this function is available |  |  |  |  |  |
| Your evaluation if this function is not available |  |  |  |  |  |

1. Daily treatment arrangement to ensure continuity of treatment*

|  | Very satisfied | Taken for granted | Indifferent | Reluctantly accept | Very dissatisfied |
| --- | --- | --- | --- | --- | --- |
| Your evaluation if this function is available |  |  |  |  |  |
| Your evaluation if this function is not available |  |  |  |  |  |

1. Rehabilitation therapists can participate in ward rounds to understand the patient's condition*

|  | Very satisfied | Taken for granted | Indifferent | Reluctantly accept | Very dissatisfied |
| --- | --- | --- | --- | --- | --- |
| Your evaluation if this function is available |  |  |  |  |  |
| Your evaluation if this function is not available |  |  |  |  |  |

1. Ability to query the executor of the patient's rehabilitation treatment program*

|  | Very satisfied | Taken for granted | Indifferent | Reluctantly accept | Very dissatisfied |
| --- | --- | --- | --- | --- | --- |
| Your evaluation if this function is available |  |  |  |  |  |
| Your evaluation if this function is not available |  |  |  |  |  |

1. Reminders for patients about various external examination information*

|  | Very satisfied | Taken for granted | Indifferent | Reluctantly accept | Very dissatisfied |
| --- | --- | --- | --- | --- | --- |
| Your evaluation if this function is available |  |  |  |  |  |
| Your evaluation if this function is not available |  |  |  |  |  |

1. Accurate disposal of medical waste after rehabilitation treatment*

|  | Very satisfied | Taken for granted | Indifferent | Reluctantly accept | Very dissatisfied |
| --- | --- | --- | --- | --- | --- |
| Your evaluation if this function is available |  |  |  |  |  |
| Your evaluation if this function is not available |  |  |  |  |  |

1. Rapid referral to the rehabilitation department/lower-level rehabilitation hospital after the patient's condition stabilizes*

|  | Very satisfied | Taken for granted | Indifferent | Reluctantly accept | Very dissatisfied |
| --- | --- | --- | --- | --- | --- |
| Your evaluation if this function is available |  |  |  |  |  |
| Your evaluation if this function is not available |  |  |  |  |  |

1. Dynamic reminders of contraindications (e.g., thrombosis, epilepsy, etc.)*

|  | Very satisfied | Taken for granted | Indifferent | Reluctantly accept | Very dissatisfied |
| --- | --- | --- | --- | --- | --- |
| Your evaluation if this function is available |  |  |  |  |  |
| Your evaluation if this function is not available |  |  |  |  |  |

1. Dynamic reminders of abnormal vital signs of patients*

|  | Very satisfied | Taken for granted | Indifferent | Reluctantly accept | Very dissatisfied |
| --- | --- | --- | --- | --- | --- |
| Your evaluation if this function is available |  |  |  |  |  |
| Your evaluation if this function is not available |  |  |  |  |  |

1. Reminders of patients' critical values*

|  | Very satisfied | Taken for granted | Indifferent | Reluctantly accept | Very dissatisfied |
| --- | --- | --- | --- | --- | --- |
| Your evaluation if this function is available |  |  |  |  |  |
| Your evaluation if this function is not available |  |  |  |  |  |

1. Reminders of patients' special requirements (e.g., no back tapping, fasting, etc.)*

|  | Very satisfied | Taken for granted | Indifferent | Reluctantly accept | Very dissatisfied |
| --- | --- | --- | --- | --- | --- |
| Your evaluation if this function is available |  |  |  |  |  |
| Your evaluation if this function is not available |  |  |  |  |  |

1. Reminders of multi-drug resistant isolation and contact isolation*

|  | Very satisfied | Taken for granted | Indifferent | Reluctantly accept | Very dissatisfied |
| --- | --- | --- | --- | --- | --- |
| Your evaluation if this function is available |  |  |  |  |  |
| Your evaluation if this function is not available |  |  |  |  |  |

1. Reminders of patients' precautions*

|  | Very satisfied | Taken for granted | Indifferent | Reluctantly accept | Very dissatisfied |
| --- | --- | --- | --- | --- | --- |
| Your evaluation if this function is available |  |  |  |  |  |
| Your evaluation if this function is not available |  |  |  |  |  |

1. Reminders of past adverse events*

|  | Very satisfied | Taken for granted | Indifferent | Reluctantly accept | Very dissatisfied |
| --- | --- | --- | --- | --- | --- |
| Your evaluation if this function is available |  |  |  |  |  |
| Your evaluation if this function is not available |  |  |  |  |  |

1. Timely handling of relevant issues during physical therapy*

|  | Very satisfied | Taken for granted | Indifferent | Reluctantly accept | Very dissatisfied |
| --- | --- | --- | --- | --- | --- |
| Your evaluation if this function is available |  |  |  |  |  |
| Your evaluation if this function is not available |  |  |  |  |  |

1. Active feedback after the completion of physical therapy*

|  | Very satisfied | Taken for granted | Indifferent | Reluctantly accept | Very dissatisfied |
| --- | --- | --- | --- | --- | --- |
| Your evaluation if this function is available |  |  |  |  |  |
| Your evaluation if this function is not available |  |  |  |  |  |

1. Timely feedback on patients' daily rehabilitation progress and phased treatment effects*

|  | Very satisfied | Taken for granted | Indifferent | Reluctantly accept | Very dissatisfied |
| --- | --- | --- | --- | --- | --- |
| Your evaluation if this function is available |  |  |  |  |  |
| Your evaluation if this function is not available |  |  |  |  |  |

1. Automatic identification and reminders of medical insurance reimbursement conditions*

|  | Very satisfied | Taken for granted | Indifferent | Reluctantly accept | Very dissatisfied |
| --- | --- | --- | --- | --- | --- |
| Your evaluation if this function is available |  |  |  |  |  |
| Your evaluation if this function is not available |  |  |  |  |  |

1. Reminders of the validity period of patients' medical insurance filing*

|  | Very satisfied | Taken for granted | Indifferent | Reluctantly accept | Very dissatisfied |
| --- | --- | --- | --- | --- | --- |
| Your evaluation if this function is available |  |  |  |  |  |
| Your evaluation if this function is not available |  |  |  |  |  |

1. Reminders to revise clinical diagnoses to prevent omissions*

|  | Very satisfied | Taken for granted | Indifferent | Reluctantly accept | Very dissatisfied |
| --- | --- | --- | --- | --- | --- |
| Your evaluation if this function is available |  |  |  |  |  |
| Your evaluation if this function is not available |  |  |  |  |  |

1. Reminders of medical expenses*

|  | Very satisfied | Taken for granted | Indifferent | Reluctantly accept | Very dissatisfied |
| --- | --- | --- | --- | --- | --- |
| Your evaluation if this function is available |  |  |  |  |  |
| Your evaluation if this function is not available |  |  |  |  |  |
