# Supplementary material for: Practice Exploration on the Integrated Clinical-Rehabilitation Treatment Scheme Based on the Quality Function Deployment Model
Source: Research Square preprint supplement (doi:10.21203/rs.3.rs-7987126/v1), 2026-01-12
Supplement: Supplementary file 2 [file e1cfa817f4924b43bf819ddd.docx]

Questionnaire on Needs Analysis for the Construction of Integrated Clinical-Rehabilitation Services

Instructions for Completion​

This questionnaire aims to collect your true feelings, core pain points, and innovative suggestions regarding the construction of integrated clinical-rehabilitation services. There are no fixed answers—please express yourself freely based on your actual work experience or medical treatment experience.​

The questionnaire consists of three sections: "Basic Information," "Feedback on Core Issues," and "Needs and Suggestions." It is estimated to take 15–20 minutes to complete. Every piece of your feedback will serve as an important basis for optimizing the service plan.​

All information will be kept strictly confidential and used solely for the analysis of integrated clinical-rehabilitation service construction. Thank you for your in-depth participation!​

I. Basic Information (Please fill in briefly for subsequent classified analysis)​

1.Your role: ______ (e.g., Patient/Family Member, Clinician in Clinical Department, Rehabilitation Physician, Rehabilitation Therapist, Nurse, Hospital Administrator, etc.)​

2.Your affiliated/visited department: ______ (e.g., Internal Medicine, Surgery, Orthopedics, Intensive Care Unit, etc.)​

3.Your experience in participating in clinical-rehabilitation work/receiving rehabilitation treatment: ______ (e.g., Less than 1 year, 1–3 years, More than 3 years; patients may indicate whether they have received rehabilitation treatment)​

4.Do you think it is necessary to develop integrated clinical-rehabilitation services? □ Yes □ No □ Not Sure​

II. Feedback on Core Issues (Please describe the problems you have encountered in detail based on actual scenarios)​

1.During the clinical-rehabilitation collaboration process (e.g., coordination between clinical departments and rehabilitation departments, formulation and implementation of rehabilitation plans, information transmission, etc.), what are the 1–2 most difficult problems you have encountered? Please provide examples (e.g., prolonged referral process for certain types of patients to the rehabilitation department, inconsistency between rehabilitation treatment information and clinical medical records, etc.):​

2.From your perspective, which links in the current rehabilitation treatment services (e.g., treatment arrangement, efficacy monitoring, cost management, risk prevention and control, etc.) have obvious deficiencies? What impacts do these deficiencies have on you (or patients)?​

3.If you have used clinical-rehabilitation related systems (e.g., rehabilitation treatment software, electronic medical record system, medical insurance verification tools, etc.), what shortcomings do you think these systems have in supporting "integrated clinical-rehabilitation services"? (e.g., disconnected functions, cumbersome operations, non-interoperable data, etc.):​

III. Needs and Suggestions (Please put forward your true needs and optimization directions based on the pain points mentioned above)​

1.To solve the above problems, what functions/mechanisms do you most hope to add or optimize? (e.g., from the patient’s perspective: "Clarify whether rehabilitation treatment is available now and its cost"; from the physician’s perspective: "Establish a sustainable rehabilitation treatment arrangement mechanism," etc.):​

1. From any of the dimensions of "improving efficiency, ensuring quality, reducing costs, and enhancing experience," which directions do you think should be the key breakthroughs in the construction of integrated clinical-rehabilitation services? Please explain the reasons:​

3.Have you seen or heard of excellent practices in the construction of integrated clinical-rehabilitation services in other hospitals/institutions? If yes, please briefly introduce them for our reference and learning:​

4.Besides the above content, do you have any additional ideas or needs regarding the construction of integrated clinical-rehabilitation services?​​

End of Questionnaire​

Thank you again for your thoughtful feedback! If you are willing to participate in subsequent plan discussions, you may leave your contact information (optional):​

Name: ______ Phone: ______ Email: ______​
